# Supplementary material
Source: MDPI journal article supplement (https://www.mdpi.com/2077-0472/13/2/301)
Supplement: s1 [file s1]

## Supplementary Materials: Characterization and fungicide screening of a new pathogen that causes leaf spot on *Rehmannia glutinosa*

Tao Dou <sup>1,†</sup>, Yubiao Cai <sup>1,†</sup>, Xuhong Song <sup>2</sup>, Futao Gao <sup>1</sup>, Yajun Zhao <sup>1</sup>, Jiafang Du <sup>1</sup>, Fengqing Wang <sup>1</sup>, Xuanzhen Li <sup>1</sup>, Shiheng An <sup>1</sup>, Xinming Yin <sup>1</sup>, Xiangyang Liu <sup>1,\*</sup> and Zhongyi Zhang <sup>3</sup>

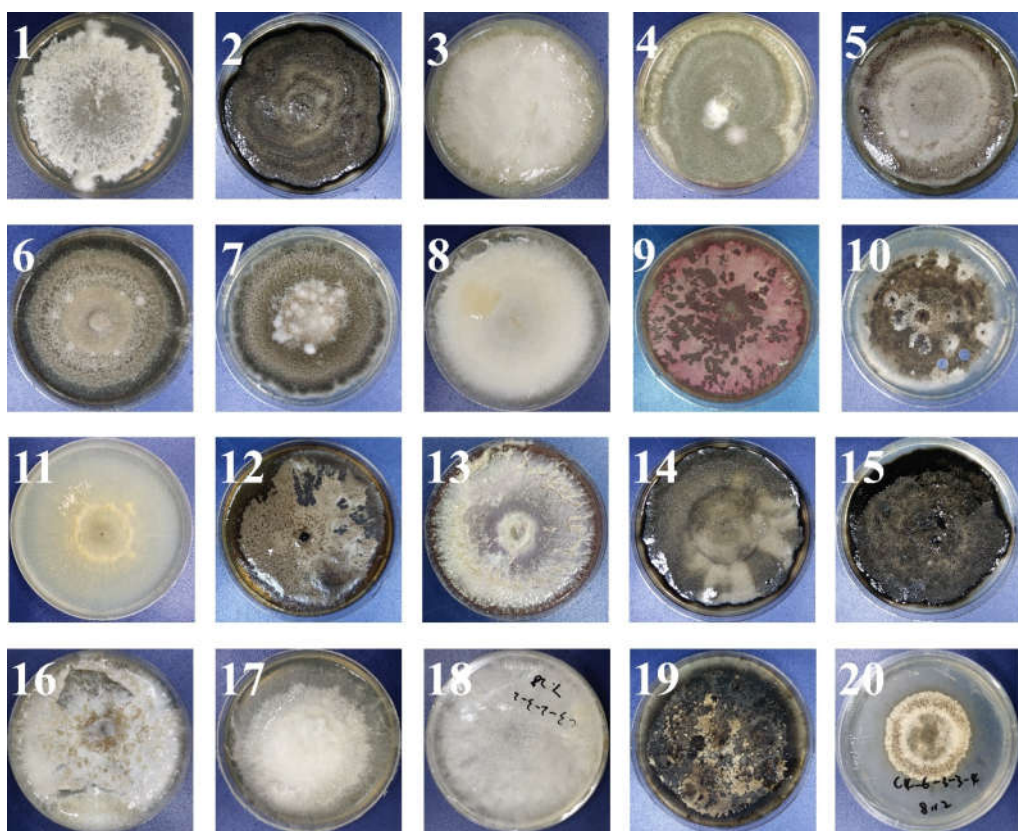

**Figure S1.** Morphological characteristics of the other 20 isolates of fungi. Numbers 1 to 20 correspond to isolates 1 to 20 isolated from diseased leaves of *Rehmannia glutinosa*, respectively.

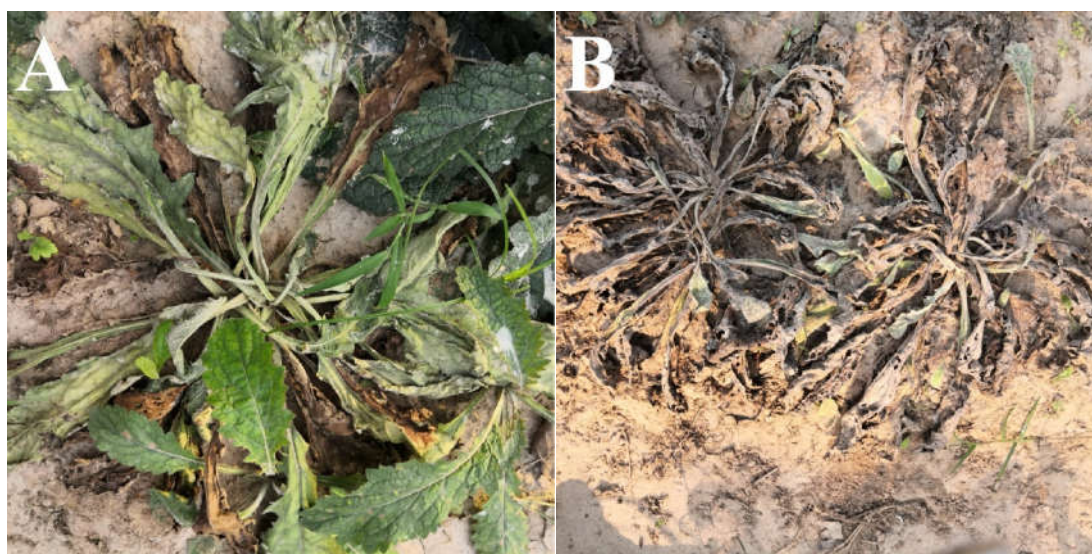

**Figure S2.** Symptoms of leaf spot disease of *Rehmannia glutinosa* in the field.

A: Symptom in the middle stage of *Rehmannia glutinosa*, B: Symptom in the late stage of *Rehmannia glutinosa*.
